# Supplementary material for: Seeking help for sexual difficulties: findings from a study with older adults in four European countries
Source: Springer Nature journal article supplement (doi:10.1007/s10433-019-00536-8), 2019-10-11
Supplement: MOESM1 [file 17264690]

# Questionnaire - sexual health and sexual habits among adults 60-75 years

|           |                   |
|-----------|-------------------|
| Project   | <b>1600199801</b> |
| Schema ID |                   |

For each question, read the question text and answers carefully before you tick your answer in the box to the right or below the answer that fits best. This questionnaire should be completed on your own and without sharing your answers with others. Your answers will be treated confidentially, and no one can know who has answered what.

|                                                                                                                                                                                                                                                                                                                                                                                                                                                                                                                                                                                                                                                                                                                                                                                                                                                                                                                                                                                                                                                                                                                                                                                                                                                                                                                                                                                                                          |                                                                                                                                                                                                                                                                                                                                                                                                                                                                                                                                                                                                                                                                                                                                                                                                                                                                                                                                                                                                                                                                                                                                                                                                                                                                                                                                                                                                                                                                                                                                                                                |
|--------------------------------------------------------------------------------------------------------------------------------------------------------------------------------------------------------------------------------------------------------------------------------------------------------------------------------------------------------------------------------------------------------------------------------------------------------------------------------------------------------------------------------------------------------------------------------------------------------------------------------------------------------------------------------------------------------------------------------------------------------------------------------------------------------------------------------------------------------------------------------------------------------------------------------------------------------------------------------------------------------------------------------------------------------------------------------------------------------------------------------------------------------------------------------------------------------------------------------------------------------------------------------------------------------------------------------------------------------------------------------------------------------------------------|--------------------------------------------------------------------------------------------------------------------------------------------------------------------------------------------------------------------------------------------------------------------------------------------------------------------------------------------------------------------------------------------------------------------------------------------------------------------------------------------------------------------------------------------------------------------------------------------------------------------------------------------------------------------------------------------------------------------------------------------------------------------------------------------------------------------------------------------------------------------------------------------------------------------------------------------------------------------------------------------------------------------------------------------------------------------------------------------------------------------------------------------------------------------------------------------------------------------------------------------------------------------------------------------------------------------------------------------------------------------------------------------------------------------------------------------------------------------------------------------------------------------------------------------------------------------------------|
| <p><b>1</b> What is your gender?</p> <p>Male ..... <input type="checkbox"/> 1</p> <p>Female ..... <input type="checkbox"/> 2</p> <p>Other ..... <input type="checkbox"/> 3</p> <hr/> <p><b>2</b> What year were you born?</p> <p>Write your year of birth: ..... <input style="width: 60px;" type="text"/></p> <hr/> <p><b>3</b> What is your highest level of formal education?</p> <p style="text-align: right; border: 1px solid black; padding: 2px;">One answer only</p> <p>Primary school (6-8 years at school) ..... <input type="checkbox"/> 1</p> <p>Lower secondary school (9-10 years at school) ..... <input type="checkbox"/> 2</p> <p>Higher secondary school, high school (12-13 years at school) ..... <input type="checkbox"/> 3</p> <p>College, lower university level (Bachelor degree level or similar) ..... <input type="checkbox"/> 4</p> <p>Higher university level (Master degree, PhD. level or similar) ..... <input type="checkbox"/> 5</p> <hr/> <p><b>4</b> Do you currently have a steady/ committed relationship with anybody? A steady/ committed relationship also includes married/ cohabiting persons.</p> <p style="border: 1px solid black; padding: 2px;">One answer only. Follow instruction to next question.</p> <p>Yes ..... ( ⇒ 8 ) <input type="checkbox"/> 1</p> <p>No ..... ( ⇒ 5 ) <input type="checkbox"/> 2</p> <p>Unsure ..... ( ⇒ 5 ) <input type="checkbox"/> 3</p> | <p><b>5</b> Have you ever had a steady/ committed relationship?</p> <p style="border: 1px solid black; padding: 2px;">One answer only. Follow instruction to next question.</p> <p style="text-align: right;">☆</p> <p>Yes ..... ( ⇒ 6 ) <input type="checkbox"/> 1</p> <p>No ..... ( ⇒ 12 ) <input type="checkbox"/> 2</p> <p>Unsure, don't wish to say ..... ( ⇒ 12 ) <input type="checkbox"/> 3</p> <hr/> <p><b>6</b> If had a steady/ committed relationship:</p> <p><b>How many years did the last steady/ committed relationship last?</b></p> <p style="text-align: right;">☆</p> <p>Write number of years (if less than 6 months, write 00, if 6-12 months, write 01):</p> <p style="border: 1px solid black; padding: 2px;">Write your answer, go to the next question. <input style="width: 40px;" type="text"/></p> <hr/> <p><b>7</b> If had a steady/ committed relationship:</p> <p><b>How many years ago did the last steady/ committed relationship end?</b></p> <p style="text-align: right;">☆</p> <p>Write number of years (if less than 6 months, write 00, if 6-12 months, write 01):</p> <p style="border: 1px solid black; padding: 2px;">Write your answer, skip to question 12. <input style="width: 40px;" type="text"/></p> <hr/> <p><b>8</b> If you have a steady/ committed relationship:</p> <p><b>How long have you been in this steady/ committed relationship?</b></p> <p style="text-align: right;">☆</p> <p>Write number of years (if less than 6 months, write 00, if 6-12 months, write 01): <input style="width: 40px;" type="text"/></p> |
|--------------------------------------------------------------------------------------------------------------------------------------------------------------------------------------------------------------------------------------------------------------------------------------------------------------------------------------------------------------------------------------------------------------------------------------------------------------------------------------------------------------------------------------------------------------------------------------------------------------------------------------------------------------------------------------------------------------------------------------------------------------------------------------------------------------------------------------------------------------------------------------------------------------------------------------------------------------------------------------------------------------------------------------------------------------------------------------------------------------------------------------------------------------------------------------------------------------------------------------------------------------------------------------------------------------------------------------------------------------------------------------------------------------------------|--------------------------------------------------------------------------------------------------------------------------------------------------------------------------------------------------------------------------------------------------------------------------------------------------------------------------------------------------------------------------------------------------------------------------------------------------------------------------------------------------------------------------------------------------------------------------------------------------------------------------------------------------------------------------------------------------------------------------------------------------------------------------------------------------------------------------------------------------------------------------------------------------------------------------------------------------------------------------------------------------------------------------------------------------------------------------------------------------------------------------------------------------------------------------------------------------------------------------------------------------------------------------------------------------------------------------------------------------------------------------------------------------------------------------------------------------------------------------------------------------------------------------------------------------------------------------------|

**9** If you have a steady/ committed relationship:  
**Is your steady/ committed relationship with a man or a woman?**

☆

Man .....  1  
 Woman .....  2  
 Other .....  3

**10** If you have a steady/ committed relationship:  
**How old is your partner?**

☆

Write the age of your partner: .....

**11** If you have a steady/ committed relationship:  
**Is your partner currently ...**

☆

**Tick all that apply**

In paid work/employed .....  1,  
 Retired from paid work .....  2,  
 Doing unpaid or voluntary work .....  3,  
 Looking after home or family, unpaid .....  4,  
 Other .....  5.

**12** **FOR ALL:**  
**How would you describe the town or community where you live?**

One answer only

Rural (under 5,000 inhabitants) .....  1  
 Small town (5,001-50,000 inhabitants) .....  2  
 Medium-sized city (from 50,001-200,000 inhabitants) .....  3  
 Suburb of a large-sized city (more than 200,000 inhabitants) .....  4  
 Downtown or in the central district of a large-sized city (more than 200,000 inhabitants) .....  5  
 Other .....  6

**13** **Are you currently.....?**

Tick all that apply

In paid work/employed .....  1,  
 Retired from paid work .....  2,  
 Doing unpaid or voluntary work .....  3,  
 Looking after home or family, unpaid .....  4,  
 Other .....  5.

**14** **Which of the options below describes best how you currently think of yourself?**

One answer only

Heterosexual .....  1  
 Gay/ Lesbian .....  2  
 Bisexual .....  3  
 Other .....  4

**15** **Do you currently regard yourself as belonging to any particular religion?**

One answer only

No .....  01  
 Yes, Christian - no particular denomination ..  02  
 Yes, Roman Catholic .....  03  
 Yes, Protestant/Church of England/Angican .....  04  
 Yes, Free Church/Non conformist/ Evangelical .....  05  
 Yes, Hindu .....  06  
 Yes, Jew .....  07  
 Yes, Islam/Muslim .....  08  
 Yes, Buddhist .....  09  
 Yes, Other .....  10  
 Don't know .....  11

**16** **Apart from special occasions such as weddings, funerals and baptisms, how often do you attend services or meetings connected with your religion?**

One answer only

Never .....  1  
 Less than once a year .....  2  
 Once a year .....  3  
 Twice a year .....  4  
 Once a month .....  5  
 Once every two weeks .....  6  
 Once a week or more .....  7

**THE FOLLOWING QUESTIONS ASK ABOUT YOUR HEALTH AND QUALITY OF LIFE**

**17** Has a doctor ever told you that you have any of the medical conditions listed below?

Tick all that apply

- Arthritis .....  01,
- Heart attack .....  02,
- Coronary Artery disease / angina / other form of heart disease .....  03,
- Hypertension, also known as high blood pressure .....  04,
- Stroke .....  05,
- Diabetes, also known as high blood sugar ...  06,
- Chronic Lung disease (not including asthma)  07,
- Parkinson's disease .....  08,
- Epilepsy .....  09,
- If you are a man:** Benign prostatic hypertrophy .....  10,
- If you are a man:** Prostate cancer .....  11,
- If you are a woman:** Cancer in the uterus or ovaries .....  12,
- If you are a woman:** Breast cancer .....  13.

**18** Are you currently taking any type of medicine prescribed by a doctor for depression?

One answer only

- Yes .....  1
- No .....  2

**19** If you are a woman: Have you ever taken hormone replacement therapy (HRT)?

One answer only

- Yes .....  1
- No .....  2

**To all: Now some questions about your views on your health. If you are unsure how to answer a question, please give the best answer you can.**

**20** In general, would you say your health is:

One answer only

- Excellent .....  1
- Very good .....  2
- Good .....  3
- Fair .....  4
- Poor .....  5

**21** The following questions are about activities you might do during a typical day.

**Does your health now limit you in these activities? If so, how much?**

Tick one box on each line

|                                                                                                         | A lot                         | To some extent                | A little                      | Not at all                    |
|---------------------------------------------------------------------------------------------------------|-------------------------------|-------------------------------|-------------------------------|-------------------------------|
| • Moderate activities such as moving a table, pushing a vacuum cleaner, bowling, or playing golf? ..... | 1<br><input type="checkbox"/> | 2<br><input type="checkbox"/> | 3<br><input type="checkbox"/> | 4<br><input type="checkbox"/> |
| • Climbing several flights of stairs? .....                                                             | <input type="checkbox"/>      | <input type="checkbox"/>      | <input type="checkbox"/>      | <input type="checkbox"/>      |

**22** During the past 4 weeks, have you had any of the following problems with your work or other regular daily activities as a result of your physical health?

Tick one box on each line

|                                                                      | Yes                      | No                       |
|----------------------------------------------------------------------|--------------------------|--------------------------|
|                                                                      | 1                        | 2                        |
| • Accomplished less than you would like? .....                       | <input type="checkbox"/> | <input type="checkbox"/> |
| • Been limited in the kind of work or other activities you do? ..... | <input type="checkbox"/> | <input type="checkbox"/> |

**23** During the past 4 weeks, have you had any of the following problems with your work or other regular daily activities as a result of any emotional problems (such as feeling depressed or anxious)?

Tick one box on each line

|                                                           | Yes                      | No                       |
|-----------------------------------------------------------|--------------------------|--------------------------|
|                                                           | 1                        | 2                        |
| • Accomplished less than you would like? .....            | <input type="checkbox"/> | <input type="checkbox"/> |
| • Did work or activities less carefully than usual? ..... | <input type="checkbox"/> | <input type="checkbox"/> |

**24** During the past 4 weeks , how much did pain interfere with your normal work (including work outside the home and housework)?

One answer only

- Not at all .....  1
- A little bit .....  2
- Moderately .....  3
- Quite a bit .....  4
- Extremely .....  5

**25** These questions are about how you have been feeling during the past 4 weeks. For each question, please give the one answer that comes closest to the way you have been feeling.

**How much of the time during the past 4 weeks ...**

Tick one box on each line

- |                                           | All the time             | Most of the time         | A good bit of the time   | Some of the time         | A little of the time     | None of the time         |
|-------------------------------------------|--------------------------|--------------------------|--------------------------|--------------------------|--------------------------|--------------------------|
|                                           | 1                        | 2                        | 3                        | 4                        | 5                        | 6                        |
| • Have you felt calm and peaceful? .....  | <input type="checkbox"/> | <input type="checkbox"/> | <input type="checkbox"/> | <input type="checkbox"/> | <input type="checkbox"/> | <input type="checkbox"/> |
| • Did you have a lot of energy? .....     | <input type="checkbox"/> | <input type="checkbox"/> | <input type="checkbox"/> | <input type="checkbox"/> | <input type="checkbox"/> | <input type="checkbox"/> |
| • Have you felt down-hearted and blue? .. | <input type="checkbox"/> | <input type="checkbox"/> | <input type="checkbox"/> | <input type="checkbox"/> | <input type="checkbox"/> | <input type="checkbox"/> |

**26** During the past 4 weeks, how much of the time has your physical health or emotional problems interfered with your social activities (like visiting friends, relatives, etc.)?

One answer only

- All the time .....  1
- Most of the time .....  2
- A good bit of the time .....  3
- Some of the time .....  4
- A little of the time .....  5
- None of the time .....  6

**27** How much do you weigh at present?

Please record in kilograms: .....

**28** How tall are you?

Please record in centimeters: .....

**29** How many hours per week do you exercise?

Apart from sports please also include household and gardening activities, walks, and bike rides to and from work and/or leisure activities

One answer only

- None .....  1
- About ½ hour per week .....  2
- About 1-2 hours per week .....  3
- About 3-4 hours per week .....  4
- About 5-6 hours per week .....  5
- 7+ hours per week .....  6

**30** On average, how much do you usually smoke during a typical week?

Write number of cigarettes/cigars/cheroots or cigarillos

If you don't smoke, write 000

**31** On average, how many alcoholic beverages do you consume in a typical week?

Write the average number of glasses in each line. If you don't drink the kind of beverage, write 00.

- Number of glasses of beer? .....
- Number of glasses of wine? .....
- Number of glasses of Port wine, Sherry etc.? .....
- Number of glasses of spirits? .....

32

Below there are some statements with which you may agree or disagree. Using the scale below, please indicate your agreement with each item by ticking your answer below the appropriate alternative. Please be open and honest in your responding

Tick one box on each line

|                                                                                         | Strongly agree           | Agree                    | Neither agree nor disagree | Disagree                 | Strongly disagree        |    |
|-----------------------------------------------------------------------------------------|--------------------------|--------------------------|----------------------------|--------------------------|--------------------------|----|
|                                                                                         | 1                        | 2                        | 3                          | 4                        | 5                        |    |
| • In most ways my life is close to my ideal .....                                       | <input type="checkbox"/> | <input type="checkbox"/> | <input type="checkbox"/>   | <input type="checkbox"/> | <input type="checkbox"/> | 1  |
| • The conditions of my life are excellent .....                                         | <input type="checkbox"/> | <input type="checkbox"/> | <input type="checkbox"/>   | <input type="checkbox"/> | <input type="checkbox"/> | 2  |
| • So far I have gotten the important things I want in life .....                        | <input type="checkbox"/> | <input type="checkbox"/> | <input type="checkbox"/>   | <input type="checkbox"/> | <input type="checkbox"/> | 3  |
| • I am satisfied with my life .....                                                     | <input type="checkbox"/> | <input type="checkbox"/> | <input type="checkbox"/>   | <input type="checkbox"/> | <input type="checkbox"/> | 4  |
| • If I could live my life over, I would change almost nothing .....                     | <input type="checkbox"/> | <input type="checkbox"/> | <input type="checkbox"/>   | <input type="checkbox"/> | <input type="checkbox"/> | 5  |
| • I am satisfied with my physical appearance .....                                      | <input type="checkbox"/> | <input type="checkbox"/> | <input type="checkbox"/>   | <input type="checkbox"/> | <input type="checkbox"/> | 6  |
| • I don't like the way I look .....                                                     | <input type="checkbox"/> | <input type="checkbox"/> | <input type="checkbox"/>   | <input type="checkbox"/> | <input type="checkbox"/> | 7  |
| • The way I look makes me feel good about myself ..                                     | <input type="checkbox"/> | <input type="checkbox"/> | <input type="checkbox"/>   | <input type="checkbox"/> | <input type="checkbox"/> | 8  |
| • The way I look makes me unattractive .....                                            | <input type="checkbox"/> | <input type="checkbox"/> | <input type="checkbox"/>   | <input type="checkbox"/> | <input type="checkbox"/> | 9  |
| • My body and face look pretty much the way I would like .....                          | <input type="checkbox"/> | <input type="checkbox"/> | <input type="checkbox"/>   | <input type="checkbox"/> | <input type="checkbox"/> | 10 |
| • I feel bad about my body and my appearance .....                                      | <input type="checkbox"/> | <input type="checkbox"/> | <input type="checkbox"/>   | <input type="checkbox"/> | <input type="checkbox"/> | 11 |
| • For me my appearance is an important part of who I am .....                           | <input type="checkbox"/> | <input type="checkbox"/> | <input type="checkbox"/>   | <input type="checkbox"/> | <input type="checkbox"/> | 12 |
| • I am often aware of the way that I look to other people .....                         | <input type="checkbox"/> | <input type="checkbox"/> | <input type="checkbox"/>   | <input type="checkbox"/> | <input type="checkbox"/> | 13 |
| • In most situations, I find myself aware of the way my face and body look .....        | <input type="checkbox"/> | <input type="checkbox"/> | <input type="checkbox"/>   | <input type="checkbox"/> | <input type="checkbox"/> | 14 |
| • I often think about the impression that the appearance of my face and body make ..... | <input type="checkbox"/> | <input type="checkbox"/> | <input type="checkbox"/>   | <input type="checkbox"/> | <input type="checkbox"/> | 15 |
| • I am usually conscious of my appearance .....                                         | <input type="checkbox"/> | <input type="checkbox"/> | <input type="checkbox"/>   | <input type="checkbox"/> | <input type="checkbox"/> | 16 |

33

During the past 4 weeks , how much were you bothered by.....

Tick one box on each line

|                                               | Not at all               | A little                 | Moderately               | Quite a bit              | Extremely                |    |
|-----------------------------------------------|--------------------------|--------------------------|--------------------------|--------------------------|--------------------------|----|
|                                               | 1                        | 2                        | 3                        | 4                        | 5                        |    |
| • Feeling blue .....                          | <input type="checkbox"/> | <input type="checkbox"/> | <input type="checkbox"/> | <input type="checkbox"/> | <input type="checkbox"/> | 1  |
| • Feeling suddenly scared for no reason ..... | <input type="checkbox"/> | <input type="checkbox"/> | <input type="checkbox"/> | <input type="checkbox"/> | <input type="checkbox"/> | 2  |
| • Feelings of worthlessness .....             | <input type="checkbox"/> | <input type="checkbox"/> | <input type="checkbox"/> | <input type="checkbox"/> | <input type="checkbox"/> | 3  |
| • Nervousness or shakiness inside .....       | <input type="checkbox"/> | <input type="checkbox"/> | <input type="checkbox"/> | <input type="checkbox"/> | <input type="checkbox"/> | 4  |
| • Thoughts about ending your life .....       | <input type="checkbox"/> | <input type="checkbox"/> | <input type="checkbox"/> | <input type="checkbox"/> | <input type="checkbox"/> | 5  |
| • Spells of terror or panic .....             | <input type="checkbox"/> | <input type="checkbox"/> | <input type="checkbox"/> | <input type="checkbox"/> | <input type="checkbox"/> | 6  |
| • Feelings of being trapped or caught .....   | <input type="checkbox"/> | <input type="checkbox"/> | <input type="checkbox"/> | <input type="checkbox"/> | <input type="checkbox"/> | 7  |
| • Worrying too much .....                     | <input type="checkbox"/> | <input type="checkbox"/> | <input type="checkbox"/> | <input type="checkbox"/> | <input type="checkbox"/> | 8  |
| • Feeling lonely .....                        | <input type="checkbox"/> | <input type="checkbox"/> | <input type="checkbox"/> | <input type="checkbox"/> | <input type="checkbox"/> | 9  |
| • Blaming yourself for things .....           | <input type="checkbox"/> | <input type="checkbox"/> | <input type="checkbox"/> | <input type="checkbox"/> | <input type="checkbox"/> | 10 |

**34** The next three questions are about how you feel about different aspects of your life. For each one, please indicate how often you feel that way.

Tick one box on each line

|                                                            | Hardly ever                   | Some of the time              | Often                         |
|------------------------------------------------------------|-------------------------------|-------------------------------|-------------------------------|
| • How often do you feel that you lack companionship? ..... | 1<br><input type="checkbox"/> | 2<br><input type="checkbox"/> | 3<br><input type="checkbox"/> |
| • How often do you feel left out? .....                    | <input type="checkbox"/>      | <input type="checkbox"/>      | <input type="checkbox"/>      |
| • How often do you feel isolated from others? .....        | <input type="checkbox"/>      | <input type="checkbox"/>      | <input type="checkbox"/>      |

**THE FOLLOWING QUESTIONS ARE ABOUT YOUR ATTITUDES AND BELIEFS**

**35** This question asks about your personal attitudes to sex. Please tick the one response that best describes your reaction to each of the following statements.

Tick one box on each line

|                                                                                                    | Strongly agree                | Agree                         | Neither agree nor disagree    | Disagree                      | Strongly disagree             |
|----------------------------------------------------------------------------------------------------|-------------------------------|-------------------------------|-------------------------------|-------------------------------|-------------------------------|
| • Having sexual relations before marriage is wrong ..                                              | 1<br><input type="checkbox"/> | 2<br><input type="checkbox"/> | 3<br><input type="checkbox"/> | 4<br><input type="checkbox"/> | 5<br><input type="checkbox"/> |
| • A married person having sexual relations with someone other than their spouse is wrong .....     | <input type="checkbox"/>      | <input type="checkbox"/>      | <input type="checkbox"/>      | <input type="checkbox"/>      | <input type="checkbox"/>      |
| • Two adults of the same sex having sexual relations is wrong .....                                | <input type="checkbox"/>      | <input type="checkbox"/>      | <input type="checkbox"/>      | <input type="checkbox"/>      | <input type="checkbox"/>      |
| • Having one night stands is wrong .....                                                           | <input type="checkbox"/>      | <input type="checkbox"/>      | <input type="checkbox"/>      | <input type="checkbox"/>      | <input type="checkbox"/>      |
| • Satisfactory sexual relations are essential to the maintenance of a long-term relationship ..... | <input type="checkbox"/>      | <input type="checkbox"/>      | <input type="checkbox"/>      | <input type="checkbox"/>      | <input type="checkbox"/>      |
| • Sexual relations without love is OK .....                                                        | <input type="checkbox"/>      | <input type="checkbox"/>      | <input type="checkbox"/>      | <input type="checkbox"/>      | <input type="checkbox"/>      |
| • People are under a lot of pressure to have sex nowadays .....                                    | <input type="checkbox"/>      | <input type="checkbox"/>      | <input type="checkbox"/>      | <input type="checkbox"/>      | <input type="checkbox"/>      |
| • There's too much sex in the media nowadays .....                                                 | <input type="checkbox"/>      | <input type="checkbox"/>      | <input type="checkbox"/>      | <input type="checkbox"/>      | <input type="checkbox"/>      |
| • Young people today start having sex too early .....                                              | <input type="checkbox"/>      | <input type="checkbox"/>      | <input type="checkbox"/>      | <input type="checkbox"/>      | <input type="checkbox"/>      |
| • Men have a naturally higher sex drive than women .                                               | <input type="checkbox"/>      | <input type="checkbox"/>      | <input type="checkbox"/>      | <input type="checkbox"/>      | <input type="checkbox"/>      |
| • The ability to have sex decreases as a person grows older .....                                  | <input type="checkbox"/>      | <input type="checkbox"/>      | <input type="checkbox"/>      | <input type="checkbox"/>      | <input type="checkbox"/>      |
| • Sexual changes that occur with age are not important to older people .....                       | <input type="checkbox"/>      | <input type="checkbox"/>      | <input type="checkbox"/>      | <input type="checkbox"/>      | <input type="checkbox"/>      |
| • Being sexually active is physically and psychologically beneficial to older people .....         | <input type="checkbox"/>      | <input type="checkbox"/>      | <input type="checkbox"/>      | <input type="checkbox"/>      | <input type="checkbox"/>      |

**WE WILL NOW ASK YOU SOM QUESTIONS RELATED TO YOUR SEX LIFE AND SEXUAL EXPERIENCES**

The questions that follow use terms like sexual intercourse, oral sex and vaginal intercourse. So that everyone attaches the same meaning to these terms, they are explained:

**PARTNERS OR SEXUAL PARTNERS:** People who have had sex together - whether just once, or a few times, or as regular partners, or as married partners.

**VAGINAL SEX (vaginal sexual intercourse):** A penis, or other objects inserted in a woman's vagina.

**ORAL SEX (oral sexual intercourse):** A woman's/ man's mouth on a partner's genital area.

**ANAL SEX (anal sexual intercourse):** A penis or other objects inserted in own/partner's anus (rectum or back passage).

**SEXUAL INTERCOURSE:** This includes vaginal, oral and/or anal sex with another person.

**HAVING/ HAD SEX:** This include sexual intercourse, masturbation, petting or fondling.

**36** Have you ever in your lifetime had any sexual activity (sexual intercourse, masturbation, petting or fondling)?

One answer only

Yes .....  1

No .....  2

**37** What activities related to love and sexuality do you engage in on the Internet?

Tick all that apply

I am not doing anything related to love and sexuality on Internet .....  01,

Using social media such as Facebook or Twitter to find a committed partner .....  02,

Checking out dating sites to find a committed partner .....  03,

Using social media such as Facebook or Twitter to find a partner for sex .....  04,

Checking out dating sites to find sex partners .....  05,

Reading or watching erotica or pornography .....  06,

Seeking sexuality counseling .....  07,

Seeking information or advice .....  08,

Buying sex products (sex-toys, erotica, Viagra, lubricants etc.) .....  09,

Other .....  10.

**38** Compared to 10 years ago, how would you rate your interest in sex?

One answer only

Much lower .....  1

Somewhat lower .....  2

About the same .....  3

Somewhat higher .....  4

Much higher .....  5

**39** How satisfied are you with the current level of sexual activity in your life, in a general way?

One answer only

Very satisfied .....  1

Rather satisfied .....  2

Neither satisfied nor dissatisfied .....  3

Rather dissatisfied .....  4

Very dissatisfied .....  5

**40** Have you sought professional help for a sexual issue in the last 5 years?

Tick all that apply

No ..... ( ⇒ 43 )  1,

Yes, because sexual activity is important to me .....  2,

Yes, because sexual activity is important to our relationship .....  3,

Yes, because my partner wanted me to .....  4,

Yes, because the change in my sex life had a negative impact on how I felt (e.g. sad, depressed, frustrated) .....  5,

Yes, because the change in our sex life had a negative impact on our relationship (e.g. loss of love, tension, arguments) .....  6,

Yes, because I feared that my partner would seek another sexual partner .....  7,

Yes, because I was concerned that I would not be able to meet a new sexual partner ...  8,

Yes, for other reasons .....  9.

**41** If received professional help, was this from:

Tick all that apply

☆

Primary care physician / General practitioner  01,

Primary care nurse .....  02,

Secondary care nurse .....  03,

Secondary care doctor .....  04,

Physiotherapist .....  05,

Support worker .....  06,

Social worker .....  07,

Sexual and relationship therapist .....  08,

Psychologist .....  09,

Other .....  10.

**42** If you received professional help, how satisfied were you with the help you received?

One answer only

☆

Very dissatisfied .....  1

Dissatisfied .....  2

Neither dissatisfied nor satisfied .....  3

Satisfied .....  4

Very satisfied .....  5

**43** **To all:**  
**In the past 5 years, has a doctor or other health professional asked you about your sex life?**

**One answer only**

Yes .....  1  
 No .....  2

**44** **Have you sought help for a sexuality related issue or problem from any of the following sources in the past 5 years?**

**Tick all that apply**

Friend .....  01,  
 Family member .....  02,  
 Partner .....  03,  
 Helpline .....  04,  
 Health center or clinic .....  05,  
 Internet websites .....  06,  
 Internet discussion groups .....  07,  
 Magazines .....  08,  
 Self-help books/Information leaflets .....  09,  
 Self-help groups .....  10,  
 GP/Family doctor .....  11,  
 Sexual health/GUM/STI clinic .....  12,  
 Psychiatrist or psychologist .....  13,  
 Relationship counsellor .....  14,  
 Other type of clinic or doctor .....  15,  
 Have not sought any help .....  16.

**45** **If you have experienced a sexual issue and NOT sought help, what was the reason(s) for this?**

**Tick all that apply**

Embarrassed .....  1,  
 Ashamed .....  2,  
 Didn't have time .....  3,  
 Expected it would clear up on its own .....  4,  
 Symptoms did not bother me .....  5,  
 I did not know where to seek help .....  6,  
 Other reasons .....  7.

**46** **Have you ever, in your life time, been in a situation in which you did or had to do something sexual against your will or without your consent?**

**One answer only**

Never .....  1  
 Yes, before the age of 18 .....  2  
 Yes, after the age of 18 .....  3  
 Yes, both before and after the age of 18 .....  4

**IF YOU NEVER HAD SEX (ANSWERED NO ON QUESTION 36), EXIT THE QUESTIONNAIRE, AND SEND IT TO IPSOS AS SOON AS POSSIBLE.**

**THANK YOU VERY MUCH FOR YOUR PARTICIPATION!**

**FOR ALL WHO HAVE EVER HAD SEX (YES ON QUESTION 36):** The next questions are about your sex life. Some questions use the term 'having sex'. By this we mean vaginal, oral, or anal sexual intercourse, masturbation, petting or fondling. Some people go through times when they are not interested in sex or find it difficult to enjoy sexual activities. The questions that follow are about some common difficulties that people experience.



47

**FOR ALL WHO HAVE HAD SEX AND ANSWERED YES IN QUESTION 36:**

**IN EACH LINE:** ANSWER QUESTION A (EXPERIENCED) FIRST, AND THEN QUESTION B (HOW DISTRESSED IF EXPERIENCED).

Tick one or two boxes in each line

☆

|                                                                                                                             | A                                                                                               |                          | B                                                                      |                          |                          |                          |   |
|-----------------------------------------------------------------------------------------------------------------------------|-------------------------------------------------------------------------------------------------|--------------------------|------------------------------------------------------------------------|--------------------------|--------------------------|--------------------------|---|
|                                                                                                                             | In the last year, have you experienced any of the following for a period of 3 months or longer? |                          | If yes on question A: How much distress did this experience cause you? |                          |                          |                          |   |
|                                                                                                                             | Yes                                                                                             | No                       | No distress                                                            | Mild distress            | Moderate distress        | Severe distress          |   |
|                                                                                                                             | 1                                                                                               | 2                        | 1                                                                      | 2                        | 3                        | 4                        |   |
| • Lacked interest in having sex .....                                                                                       | <input type="checkbox"/>                                                                        | <input type="checkbox"/> | <input type="checkbox"/>                                               | <input type="checkbox"/> | <input type="checkbox"/> | <input type="checkbox"/> | 1 |
| • Lacked enjoyment in sex .....                                                                                             | <input type="checkbox"/>                                                                        | <input type="checkbox"/> | <input type="checkbox"/>                                               | <input type="checkbox"/> | <input type="checkbox"/> | <input type="checkbox"/> | 2 |
| • Felt anxious during sex .....                                                                                             | <input type="checkbox"/>                                                                        | <input type="checkbox"/> | <input type="checkbox"/>                                               | <input type="checkbox"/> | <input type="checkbox"/> | <input type="checkbox"/> | 3 |
| • Felt physical pain as a result of sex                                                                                     | <input type="checkbox"/>                                                                        | <input type="checkbox"/> | <input type="checkbox"/>                                               | <input type="checkbox"/> | <input type="checkbox"/> | <input type="checkbox"/> | 4 |
| • Felt no excitement or arousal during sex .....                                                                            | <input type="checkbox"/>                                                                        | <input type="checkbox"/> | <input type="checkbox"/>                                               | <input type="checkbox"/> | <input type="checkbox"/> | <input type="checkbox"/> | 5 |
| • Did not reach a climax (experience an orgasm) or took a long time to reach a climax despite feeling excited/aroused ..... | <input type="checkbox"/>                                                                        | <input type="checkbox"/> | <input type="checkbox"/>                                               | <input type="checkbox"/> | <input type="checkbox"/> | <input type="checkbox"/> | 6 |
| • Reached a climax (experienced an orgasm) more quickly than you would like .....                                           | <input type="checkbox"/>                                                                        | <input type="checkbox"/> | <input type="checkbox"/>                                               | <input type="checkbox"/> | <input type="checkbox"/> | <input type="checkbox"/> | 7 |
| • <b>If woman:</b> Had an uncomfortably dry vagina .....                                                                    | <input type="checkbox"/>                                                                        | <input type="checkbox"/> | <input type="checkbox"/>                                               | <input type="checkbox"/> | <input type="checkbox"/> | <input type="checkbox"/> | 8 |
| • <b>If man:</b> Had trouble getting or keeping an erection .....                                                           | <input type="checkbox"/>                                                                        | <input type="checkbox"/> | <input type="checkbox"/>                                               | <input type="checkbox"/> | <input type="checkbox"/> | <input type="checkbox"/> | 9 |

48

**Thinking about your sex life in the last year: All things considered, how satisfied are you with your sexual life?**

One answer only

☆

|                          |                          |                                    |                          |                          |
|--------------------------|--------------------------|------------------------------------|--------------------------|--------------------------|
| Completely dissatisfied  | Dissatisfied             | Neither satisfied nor dissatisfied | Satisfied                | Completely satisfied     |
| 1                        | 2                        | 3                                  | 4                        | 5                        |
| <input type="checkbox"/> | <input type="checkbox"/> | <input type="checkbox"/>           | <input type="checkbox"/> | <input type="checkbox"/> |

1

**49** Compared to 10 years ago, how would you rate your overall enjoyment in sex?

One answer only

☆

- Much lower .....  1
- Somewhat lower .....  2
- About the same .....  3
- Somewhat higher .....  4
- Much higher .....  5

**50** Compared to 10 years ago, how would you rate the quality of your orgasm?

One answer only

☆

- Much lower .....  1
- Somewhat lower .....  2
- About the same .....  3
- Somewhat higher .....  4
- Much higher .....  5
- I do not experience orgasm .....  6

**51** In your lifetime, how would you rate your sexual activity throughout most of your life (until the age of 60)?

One answer only

☆

- I was sexually very active .....  1
- I was moderately sexually active .....  2
- Neither active nor inactive .....  3
- I was moderately sexually inactive .....  4
- I was sexually very inactive .....  5

**52** Have you had any sexual activity (sexual intercourse, masturbation, petting or fondling) in the past year?

One answer only

☆

- Yes .....  1
- No .....  2

**THE FOLLOWING QUESTIONS ASK ABOUT THE FREQUENCY OF YOUR SEXUAL ACTIVITIES DURING THE PAST MONTH.**

**53** How many times have you had or attempted sexual intercourse (vaginal, anal or oral sex) during the past month?

One answer only

☆

- None .....  1
- Once in the past month .....  2
- 2 or 3 times in the past month .....  3
- Once a week .....  4
- 2 or 3 times a week .....  5
- Once a day .....  6
- More than once a day .....  7

**54** How often did you masturbate in the past month?

One answer only

☆

- None .....  1
- Once in the past month .....  2
- 2 or 3 times in the past month .....  3
- Once a week .....  4
- 2 or 3 times a week .....  5
- Once a day .....  6
- More than once a day .....  7

**55** Thinking about the past month, have you been worried or concerned by the overall frequency of your sexual activities (sexual intercourse, kissing, fondling and petting and masturbation)?

One answer only

☆

- Not at all worried or concerned .....  1
- A little bit worried or concerned .....  2
- Moderately worried or concerned .....  3
- Very worried or concerned .....  4
- Extremely worried or concerned .....  5

**56** Have you ever had sexual intercourse?

One answer only

☆

- Yes .....  1
- No .....  2

**IF YOU NEVER HAD SEX WITH A PARTNER, EXIT THE QUESTIONNAIRE AND SEND IT TO IPSOS AS SOON AS POSSIBLE.**

**THANK YOU VERY MUCH FOR YOUR PARTICIPATION!**

**57** This question is about the person you had sex with most recently, whether this was quite recently or some while ago. Was the person you had sex with most recently your regular spouse or committed partner?

One answer only

- ☆
- Yes .....  1
- No .....  2
- Do not want to answer .....  3

**PLEASE COMPLETE THE FOLLOWING QUESTIONS WITH YOUR REGULAR SEX PARTNER OR COMMITTED PARTNER IN MIND.**

**IF YOU DO NOT HAVE A REGULAR OR COMMITTED PARTNER, SKIP TO QUESTION 63**

**58** Thinking about your relationship with your partner, how much do you agree or disagree with the following statement:

**I feel emotionally close to my partner when we have sex together**

One answer only

- ☆
- Agree .....  1
- Strongly agree .....  2
- Neither agree nor disagree .....  3
- Disagree .....  4
- Strongly disagree .....  5

**59** On a scale of 1 to 7, where 1 means 'very happy' and 7 means 'very unhappy': How happy or unhappy are you with your relationship with your partner, all things considered?

One answer only

- ☆
- |              |               |                  |                             |                    |                 |                |
|--------------|---------------|------------------|-----------------------------|--------------------|-----------------|----------------|
| 1 Very happy | 2 Quite happy | 3 Somewhat happy | 4 Neither happy nor unhappy | 5 Somewhat unhappy | 6 Quite unhappy | 7 Very unhappy |
|--------------|---------------|------------------|-----------------------------|--------------------|-----------------|----------------|

Tick your answer: ...       1       2       3       4       5       6       7

**60** Please indicate how much you agree with each of the following statements with your regular partner or spouse in mind :

Tick one box on each line

|                                                                              | Strongly agree           | Agree                    | Neither agree nor disagree | Disagree                 | Strongly disagree        |    |
|------------------------------------------------------------------------------|--------------------------|--------------------------|----------------------------|--------------------------|--------------------------|----|
|                                                                              | 1                        | 2                        | 3                          | 4                        | 5                        |    |
| • This person completely accepts me as I am. ....                            | <input type="checkbox"/> | <input type="checkbox"/> | <input type="checkbox"/>   | <input type="checkbox"/> | <input type="checkbox"/> | 1  |
| • I can share my deepest thoughts and feelings with this person. ....        | <input type="checkbox"/> | <input type="checkbox"/> | <input type="checkbox"/>   | <input type="checkbox"/> | <input type="checkbox"/> | 2  |
| • This person cares deeply for me. ....                                      | <input type="checkbox"/> | <input type="checkbox"/> | <input type="checkbox"/>   | <input type="checkbox"/> | <input type="checkbox"/> | 3  |
| • This person would willingly help me in any way. ....                       | <input type="checkbox"/> | <input type="checkbox"/> | <input type="checkbox"/>   | <input type="checkbox"/> | <input type="checkbox"/> | 4  |
| • My thoughts and feelings are understood and affirmed by this person. ....  | <input type="checkbox"/> | <input type="checkbox"/> | <input type="checkbox"/>   | <input type="checkbox"/> | <input type="checkbox"/> | 5  |
| • My partner has experienced sexual difficulties in the last year ....       | <input type="checkbox"/> | <input type="checkbox"/> | <input type="checkbox"/>   | <input type="checkbox"/> | <input type="checkbox"/> | 6  |
| • My partner and I share about the same level of interest in having sex .... | <input type="checkbox"/> | <input type="checkbox"/> | <input type="checkbox"/>   | <input type="checkbox"/> | <input type="checkbox"/> | 7  |
| • My partner and I share the same sexual likes and dislikes ....             | <input type="checkbox"/> | <input type="checkbox"/> | <input type="checkbox"/>   | <input type="checkbox"/> | <input type="checkbox"/> | 8  |
| • I am not interested in sex ....                                            | <input type="checkbox"/> | <input type="checkbox"/> | <input type="checkbox"/>   | <input type="checkbox"/> | <input type="checkbox"/> | 9  |
| • My partner has no interest in sex ....                                     | <input type="checkbox"/> | <input type="checkbox"/> | <input type="checkbox"/>   | <input type="checkbox"/> | <input type="checkbox"/> | 10 |

**61** My partner and I kiss and cuddle each other.....

One answer only. Tick what fits best.

- Very seldom or seldom .....  1
- Often or very often .....  2

**62** Over the past 4 weeks , how often have you been sexually touched and caressed by your partner?

One answer only.

- Not at all, once or twice or weekly .....  1
- 2-3 times a week, almost daily or daily .....  2

**63** How often have you avoided sex during the last year?

One answer only

- Never ..... ( ⇒ 65 )  1
- Rarely .....  2
- Sometimes .....  3
- Often .....  4
- Always or almost always .....  5

**64** If you have avoided sex: Why have you avoided having sex?

Tick all that apply

- Relationship problems .....  1,
- Worries about sexually transmitted infections .....  2,
- Sexual difficulties .....  3,
- Partner's sexual difficulties .....  4,
- Body image concerns .....  5,
- Health problems .....  6,
- I'm not interested in sex anymore .....  7,
- Other .....  8.

**65** In general, do you and your partner use any lubricants during sexual activity?

One answer only

- Yes .....  1
- No .....  2

**66** Have you or your partner ever taken any type of medicine or pills to assist your sexual performance, for example Viagra, Cialis, Levitra or Spedra?

One answer only

- Yes .....  1
- No .....  2
- Don't know .....  3

**Thank you very much for your help and great contribution to scientific research on sexual health and habits. Please put the completed questionnaire in the pre paid envelope and post it to IPSOS as soon as possible.**
